# Supplementary material for: Love Bites – Do Venomous Arachnids Make Safe Pets?
Source: Preprints.org preprint supplement (doi:10.20944/preprints202009.0261.v1), 2020-09-12
Supplement: Supplementary file 4 [file supplementary]

## Umfrage

### Vergiftungen durch Spinnentiere in Terrarienhaltung (Spinnenbisse und Skorpionsstiche)

durch Tobias J. Hauke, Geoffrey K. Isbister und Volker Herzig

Bitte alle Zwischenfälle (i.d.R. Bisse oder Stiche) mit Spinnentieren, welche im Terrarium gehalten werden, durch Ausfüllen des folgenden Fragebogens dokumentieren. Dabei für jeden Zwischenfall bitte einen separaten Fragebogen ausfüllen und dann wie folgt übermitteln:

- Als Word- oder PDF-Datei per E-Mail senden an: t.hauke87@web.de
- Oder ausgedruckt per Post senden an: Tobias Hauke, Prälat-Wellenhofer-Straße 21, 81377 München, Deutschland

#### Umstände

##### **Gebissene/gestochene Person:**

---

Geburtsdatum:

Geschlecht:

Existieren etwaige Vorerkrankungen:

Wurden vor dem Biss/Stich Medikamente oder Alkohol eingenommen:

##### **Spinnentier, welches den Biss/Stich verursacht hat:<sup>1</sup>**

---

Gattung/Art:

Alter/Größe:

Geschlecht:

##### **Biss/Stich:**

---

An welcher Körperstelle fand der Biss/Stich statt:

Wurde mehrmals zugebissen/-gestochen (und ggf. wie oft):

Datum und Uhrzeit, wann der Biss/Stich stattfand:

**Auswirkungen: Anzeichen und Symptome** (bitte zutreffendes ankreuzen)

**Lokalisierte Anzeichen/Symptome an der Biss-/Stich-Stelle:**

---

- |                                                             |                     |
|-------------------------------------------------------------|---------------------|
| <input type="checkbox"/> Klar erkennbare Einstichstellen    | Dauer: <sup>2</sup> |
| <input type="checkbox"/> Blutung                            | Dauer: <sup>2</sup> |
| <input type="checkbox"/> Rötung                             | Dauer: <sup>2</sup> |
| <input type="checkbox"/> Schwellung                         | Dauer: <sup>2</sup> |
| <input type="checkbox"/> Jucken                             | Dauer: <sup>2</sup> |
| <input type="checkbox"/> Parästhesie <sup>3</sup>           | Dauer: <sup>2</sup> |
| <input type="checkbox"/> Taubheit                           | Dauer: <sup>2</sup> |
| <input type="checkbox"/> Schweißabsonderung                 | Dauer: <sup>2</sup> |
| <input type="checkbox"/> Lähmung                            | Dauer: <sup>2</sup> |
| <input type="checkbox"/> Nekrose                            | Dauer: <sup>2</sup> |
| <input type="checkbox"/> Weitere (bitte näher beschreiben): | Dauer: <sup>2</sup> |

**Schmerz**

---

- |                                                                  |                     |
|------------------------------------------------------------------|---------------------|
| <input type="checkbox"/> Lokaler Schmerz (um Biss-/Stich-Stelle) | Dauer: <sup>2</sup> |
| <input type="checkbox"/> Ausstrahlender Schmerz                  | Dauer: <sup>2</sup> |
| <input type="checkbox"/> Generalisierter Schmerz                 | Dauer: <sup>2</sup> |

**Systemische Symptome:**

---

- |                                                             |                     |
|-------------------------------------------------------------|---------------------|
| <input type="checkbox"/> Schwitzen                          | Dauer: <sup>2</sup> |
| <input type="checkbox"/> Ruhelosigkeit/Erregtheit           | Dauer: <sup>2</sup> |
| <input type="checkbox"/> Schläfrigkeit/Lethargie            | Dauer: <sup>2</sup> |
| <input type="checkbox"/> Übelkeit/Erbrechen                 | Dauer: <sup>2</sup> |
| <input type="checkbox"/> Muskelkrämpfe                      | Dauer: <sup>2</sup> |
| <input type="checkbox"/> Ausbreitende Lähmung               | Dauer: <sup>2</sup> |
| <input type="checkbox"/> Erhöhter Speichelfluss             | Dauer: <sup>2</sup> |
| <input type="checkbox"/> Kopfschmerzen                      | Dauer: <sup>2</sup> |
| <input type="checkbox"/> Atem-Schwierigkeiten               | Dauer: <sup>2</sup> |
| <input type="checkbox"/> Ohnmacht/Bewusstlosigkeit          | Dauer: <sup>2</sup> |
| <input type="checkbox"/> Priapismus <sup>4</sup>            | Dauer: <sup>2</sup> |
| <input type="checkbox"/> Weitere (bitte näher beschreiben): | Dauer: <sup>2</sup> |

**Weitere berichtenswerte Symptome:**

---

- |                          |                     |
|--------------------------|---------------------|
| <input type="checkbox"/> | Dauer: <sup>2</sup> |
| <input type="checkbox"/> | Dauer: <sup>2</sup> |

## **Behandlung**

Wurde versucht die Auswirkungen zu behandeln und ggf. wie?

Wo fand die Behandlung statt (Krankenhaus, Arzt, zu Hause):

Wann fand die Behandlung statt (wie schnell nach dem Biss/Stich):

In wie weit haben sich die Symptome nach der Behandlung verbessert:

**Wurden weitere interessante Beobachtungen gemacht?**

### **Anmerkungen:**

<sup>1</sup> Falls verfügbar, bitte Fotos des Spinnentieres, welches den Biss/Stich verursacht hat, sowie Fotos von der Biss-/Stich-Stelle zusammen mit dem Fragebogen zurücksenden.

<sup>2</sup> Bitte angeben, wie lange die Auswirkungen angedauert haben und ob diese ggf. verspätet eingesetzt haben.

<sup>3</sup> Missempfindung, wie kleine Nadelstiche.

<sup>4</sup> Andauernde Erektion ohne sexuelle Stimulation.

### **Kontakt-Daten:**

---

Die Angabe von Kontakt-Daten ist optional. Jedoch bitten wir um die Angabe einer Kontakt-Möglichkeit, da wir dann bei Unklarheiten oder, falls noch weitere Informationen benötigt werden, etwaige Rückfragen vornehmen können (unvollständige Fragebögen können sonst ggf. nicht verwendet werden). Wir, die Autoren, versichern dabei, dass die Kontakt-Daten vertraulich behandelt und weder publiziert noch an unbeteiligte Dritte weitergegeben werden.

Name:

Adresse:

E-Mail:

Telefon:

### **Ziele und Ablauf der Studie und Datenschutz:**

---

Das Ziel dieser Studie ist die systematische Untersuchung von Vergiftungen durch Spinnentiere in der Terrarienhaltung. Zu diesem Zweck bitten wir alle Terrarienhalter, welche schon einmal von einer Spinne gebissen oder einem Skorpion gestochen wurden, darum die Details des Zwischenfalles zu berichten, in dem die Fragen auf den Seiten 1 bis 3 dieses Dokuments („Fragebogen“) beantwortet werden. Der Ablauf der Studie kann im Wesentlichen in zwei Phasen eingeteilt werden: Im Rahmen einer ersten Phase sollen mittels des vorangehenden Fragebogens die entsprechenden Daten erhoben werden („Phase der Datenerhebung“). Anschließend sollen im Rahmen einer zweiten Phase die zuvor erhobenen Daten ausgewertet und die Ergebnisse in einem wissenschaftlichen Journal publiziert werden („Phase der Auswertung und Publikation“). Kontakt-Daten wie Namen und Anschrift der Teilnehmer werden nur während der Phase der Datenerhebung zum Zweck von eventuellen Rückfragen gespeichert, sie können lediglich von den Autoren (Tobias J. Hauke, Geoffrey K. Isbister und Volker Herzig) eingesehen werden und werden weder publiziert noch an unbeteiligte Dritte weitergegeben. Gegebenenfalls ist eine Teilnahme an dieser Studie auch ohne die Nennung von Kontakt-Daten möglich. Die Phase der Datenerhebung ist zunächst auf sechs Monate begrenzt, kann aber ohne weitere Bekanntgabe um bis zu weitere 12 Monate verlängert werden, falls nach Ermessen der Autoren die Erhebung weiterer Daten als sinnvoll erscheint. Während der Phase der Auswertung und Publikation werden lediglich die im Fragebogen auf den Seiten 1 bis 3 gemachten Angaben verwertet und anonymisiert und ohne Bezug zu Namen und Anschrift der Teilnehmer verwendet. Teilnehmer der Studie haben jederzeit das Recht auf Auskunft, Berichtigung und Löschung ihrer personenbezogenen Daten, sowie ihre Einwilligungserklärung zu widerrufen (zu diesem Zweck bitte kontaktieren: t.hauke87@web.de).

**Bitte Zustimmung und zutreffendes ankreuzen:**

---

**Ich habe diesen Fragebogen sorgfältig ausgefüllt und willige ein, dass meine Angaben zum Zweck dieser Studie (siehe „Ziele und Ablauf der Studie und Datenschutz“) verwendet werden dürfen:**

Ja       Nein
